# Supplementary material for: The FZD7‐TWIST1 axis is responsible for anoikis resistance and tumorigenesis in ovarian carcinoma
Source: PubMed Central journal article supplement (PMC6441896; doi:10.1002/1878-0261.12425), 2019-01-19

# Supplementary Figure 1

a

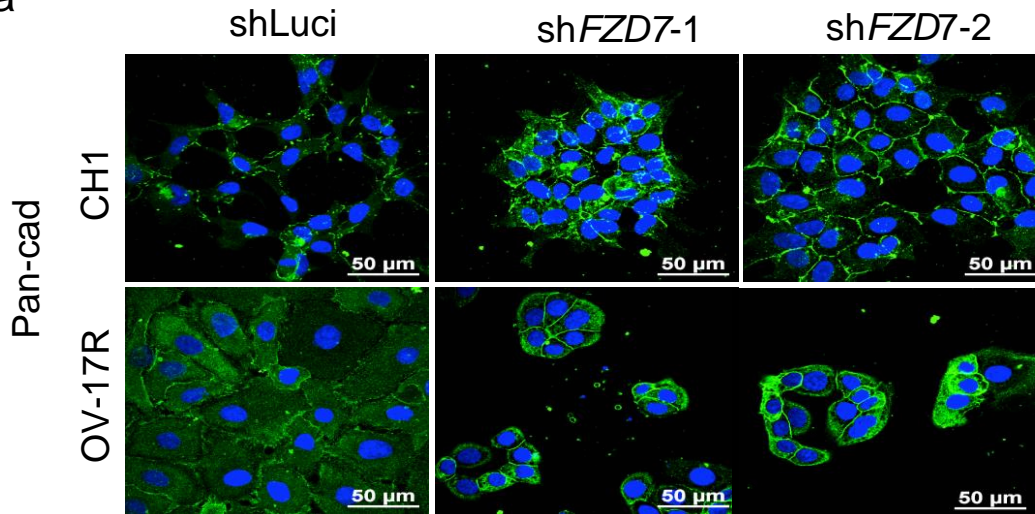

b

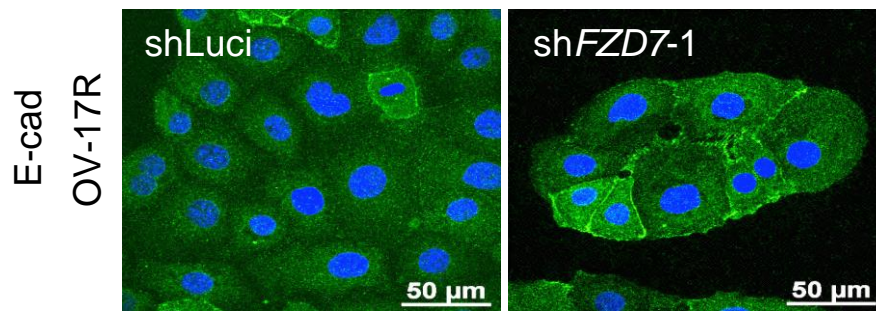

c

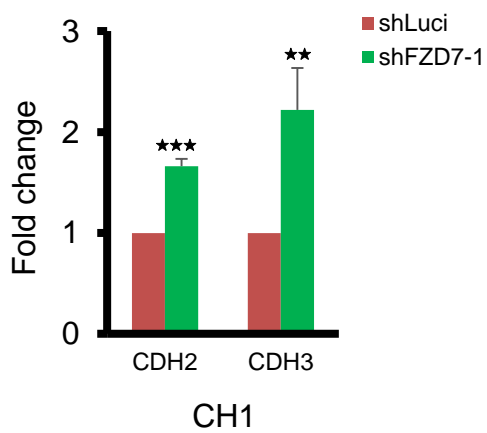

d

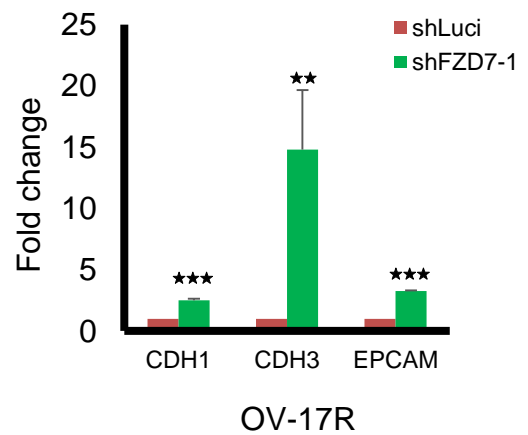

e

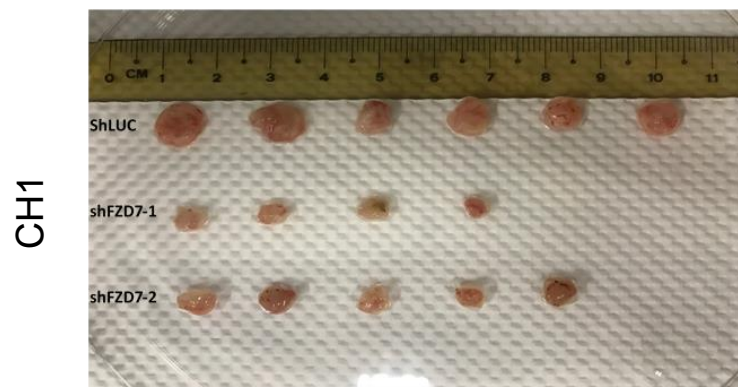

P-value \* <0.05  
 \*\* <0.01  
 \*\*\* <0.001

# Supplementary Figure 2

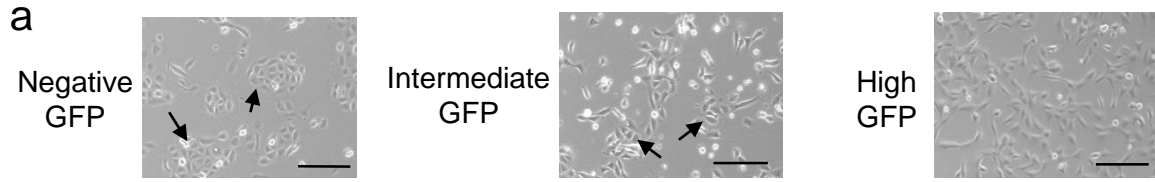

OVCA429

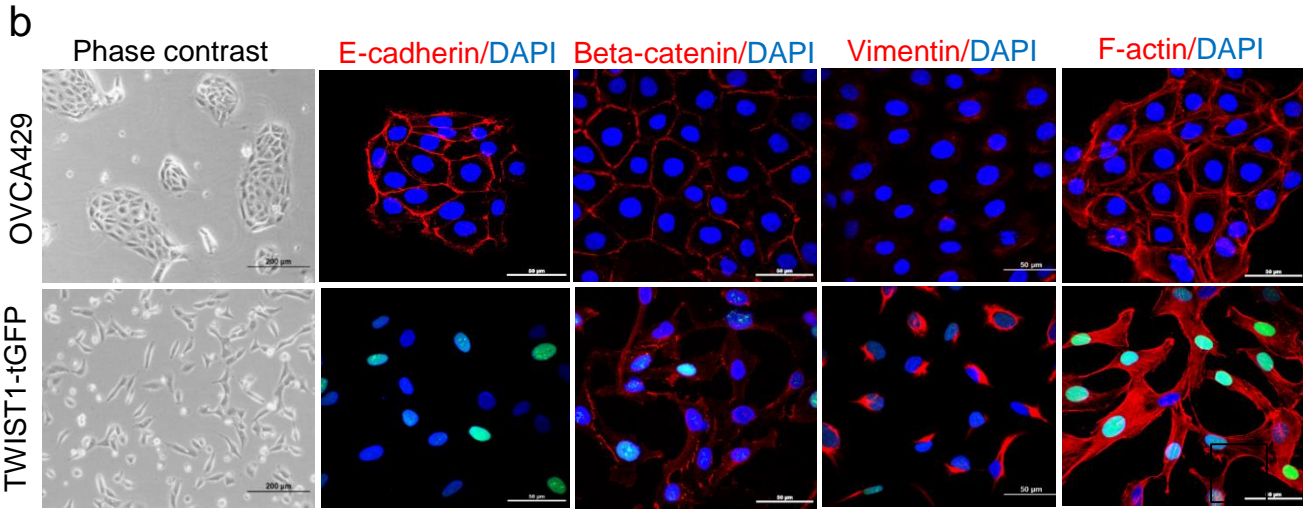

OV7

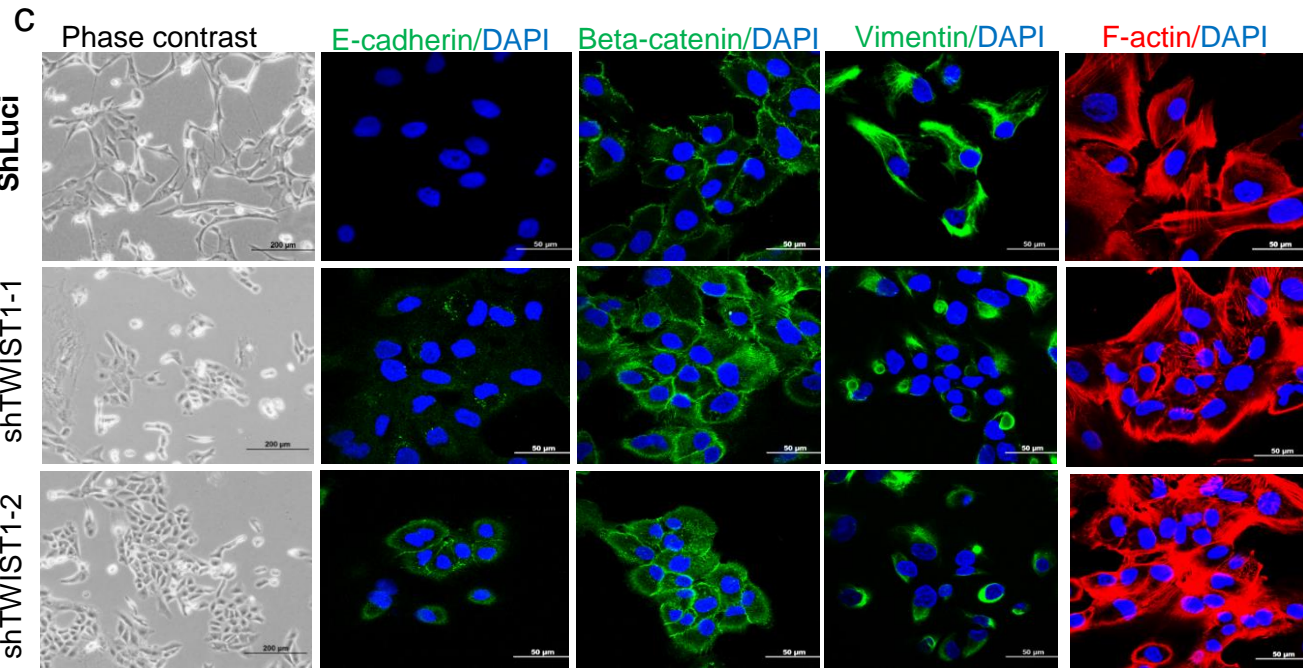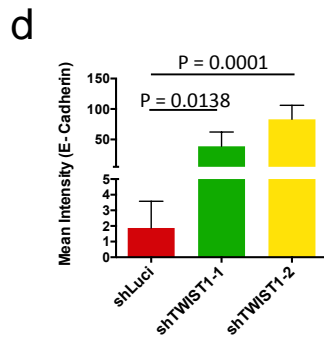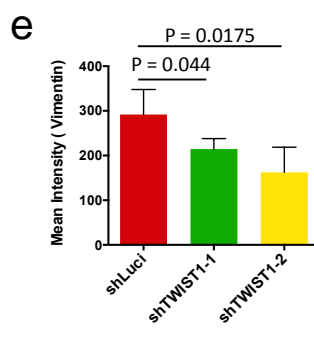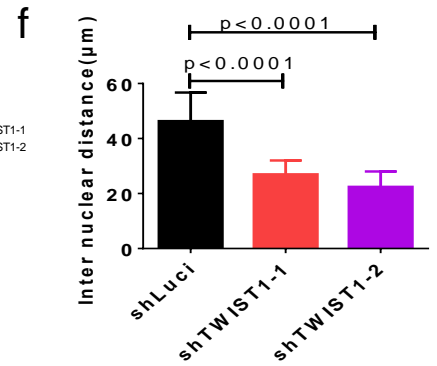

# Supplementary Figure 3

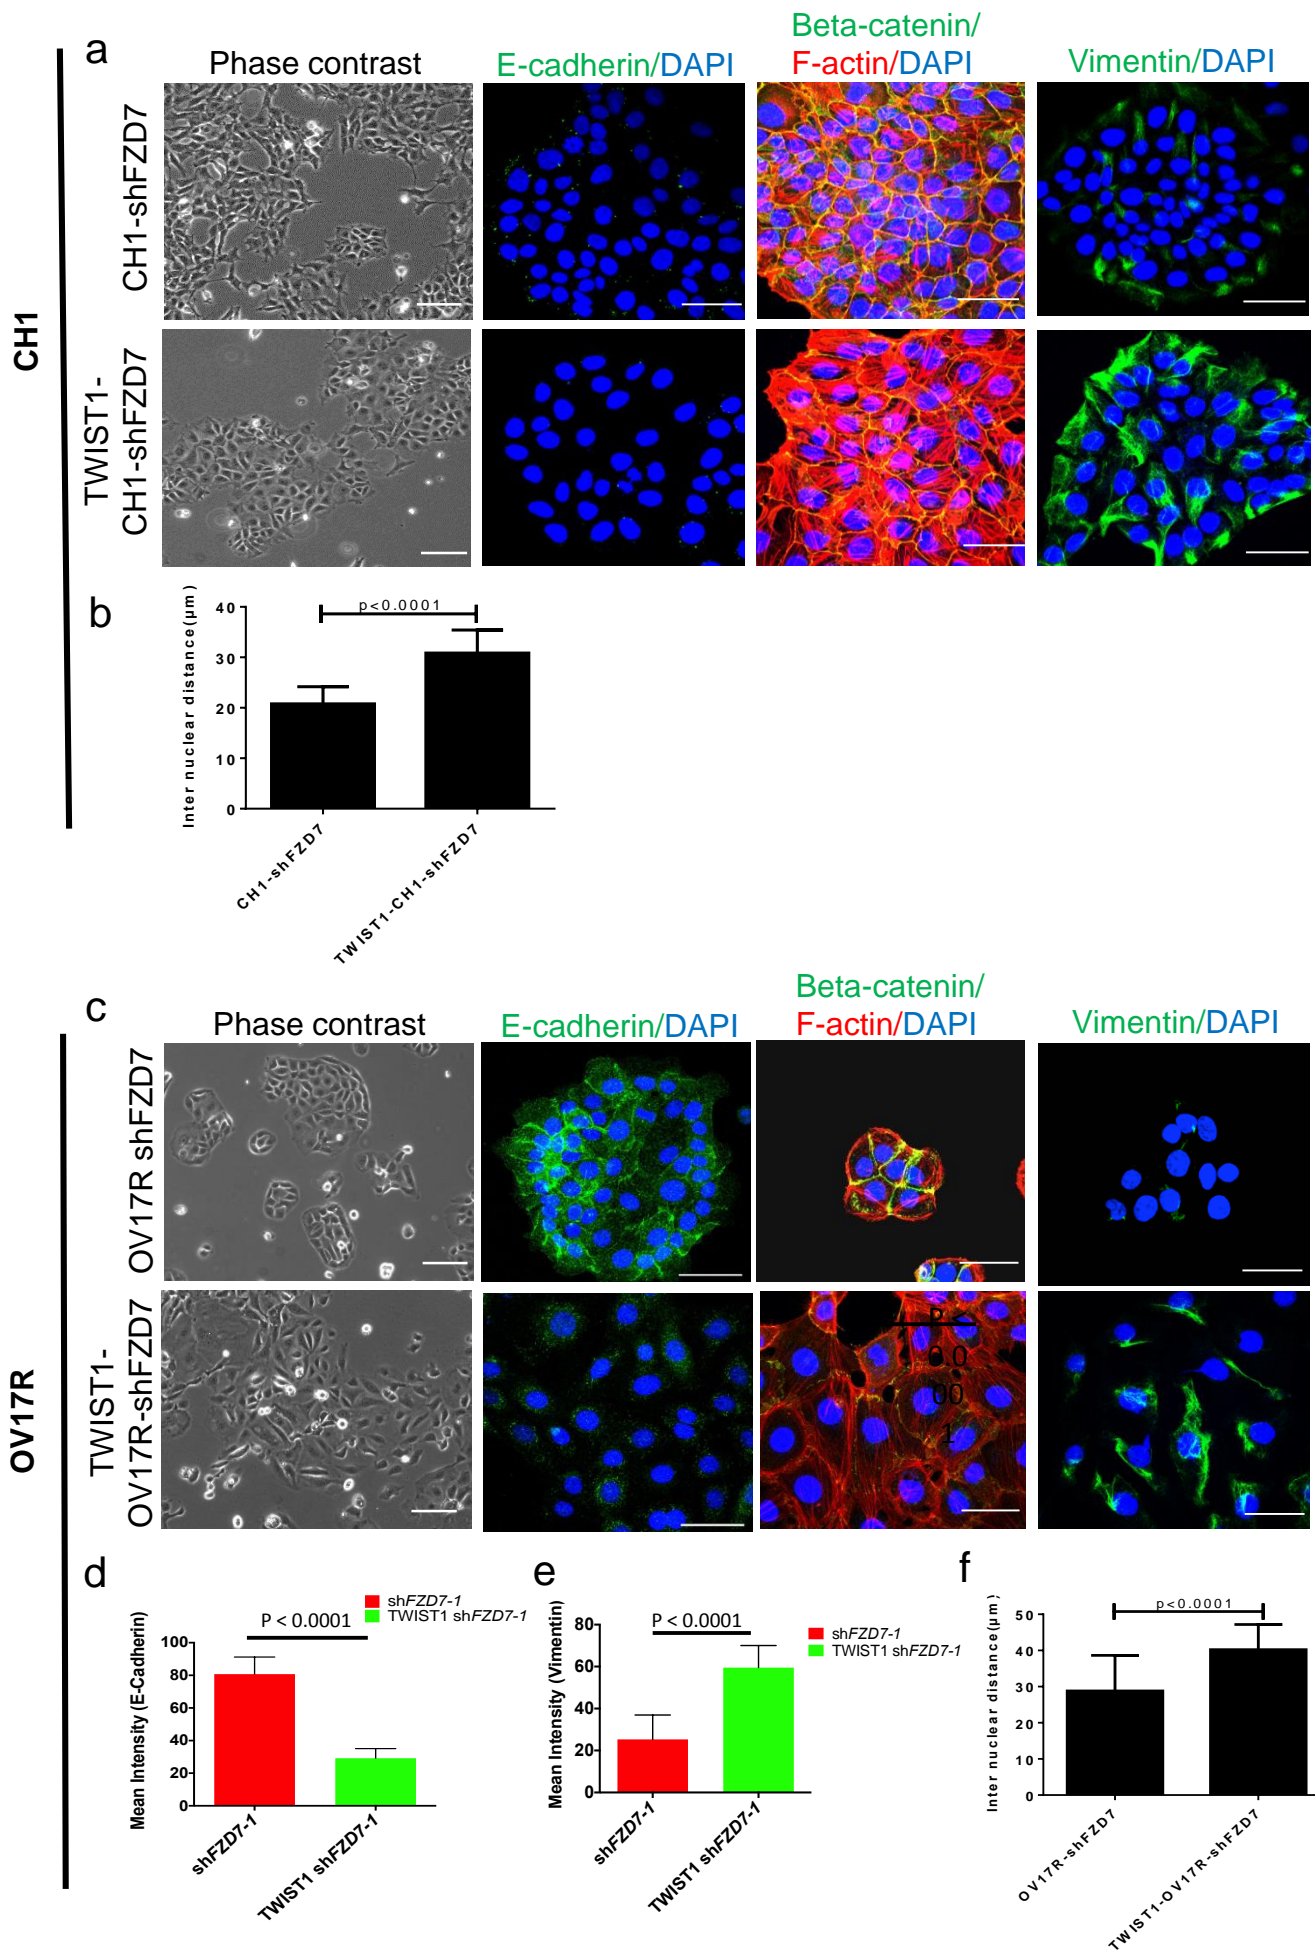

# Supplementary Figure 4

**a**

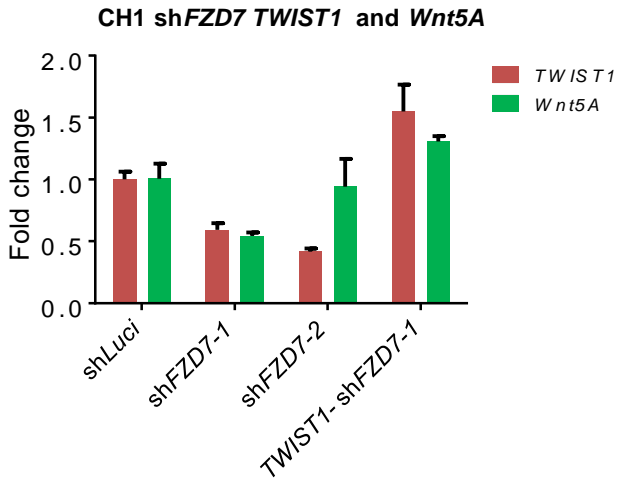

**b**

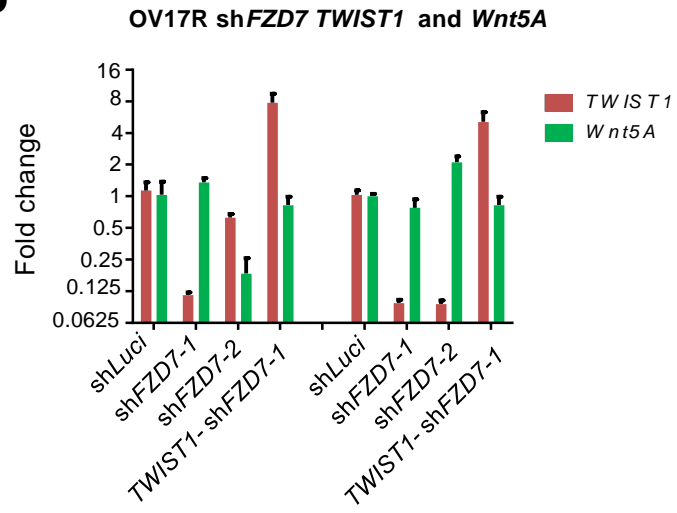

**c**

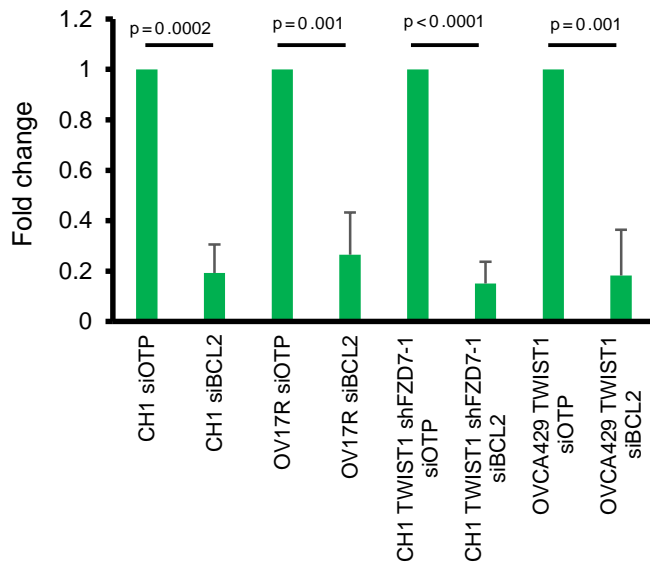

Supplement: MOL2-13-757-s001.pdf [file MOL2-13-757-s001.pdf]
